# Supplementary material
Source: MDPI journal article supplement (https://www.mdpi.com/2624-845X/3/2/7)
Supplement: s1 [file s1]

# Simultaneous Thermal and Spectroscopic Screening of Morphologically Complex Theranostic Gold Nanoparticles

Suhash Reddy Chavva,<sup>a,b</sup> Namratha Bhat,<sup>a,b</sup> Angela Michelle San Juan,<sup>a,b</sup> and Samuel Mabbott<sup>a,b</sup>

<sup>a</sup>Health Technologies and Innovations Building, 3006 TAMU, College Station, Texas, 77843

<sup>b</sup>Biomedical Engineering, Emerging Technologies Building, 3120 TAMU, College Station, Texas 77843

## Supplementary Material

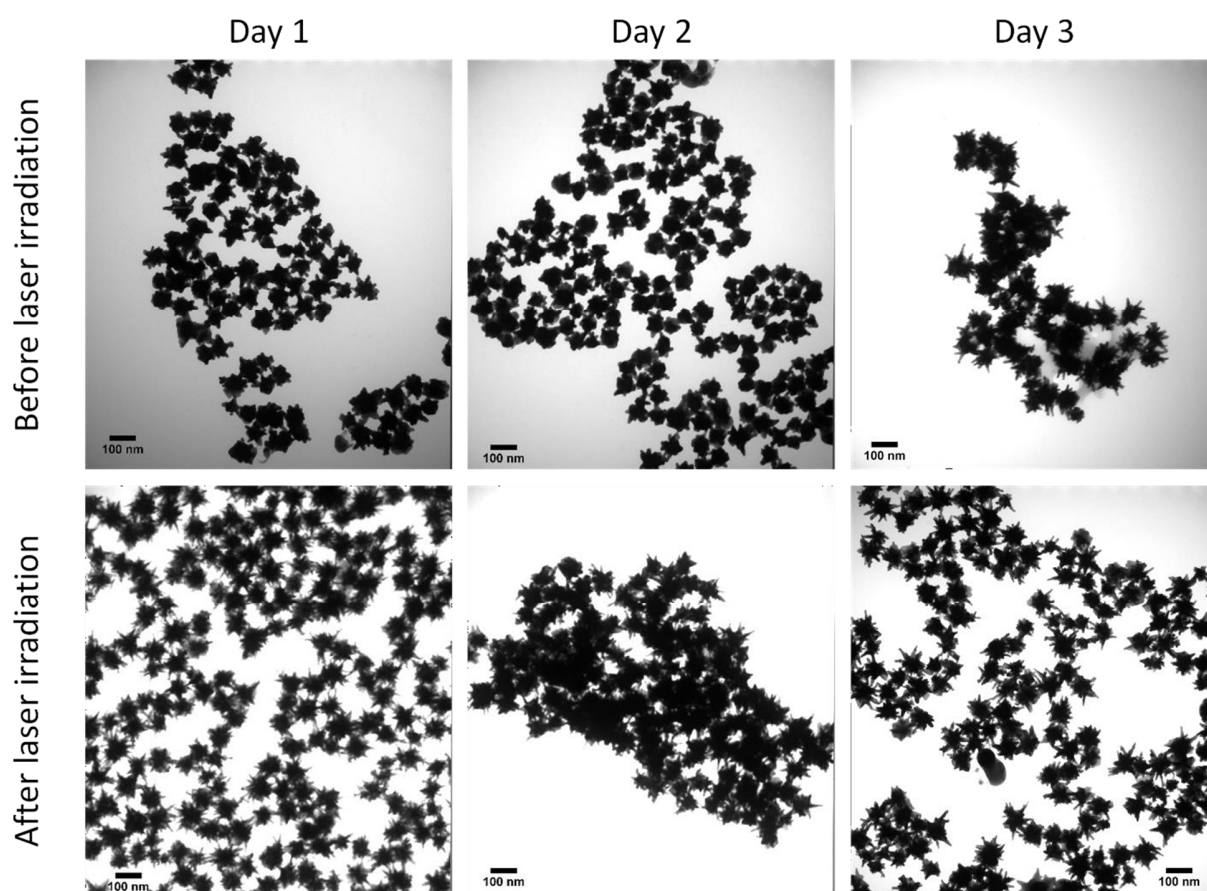

**Figure S1.** TEM images of freshly prepared AuNS before and after laser irradiation on three consecutive days.

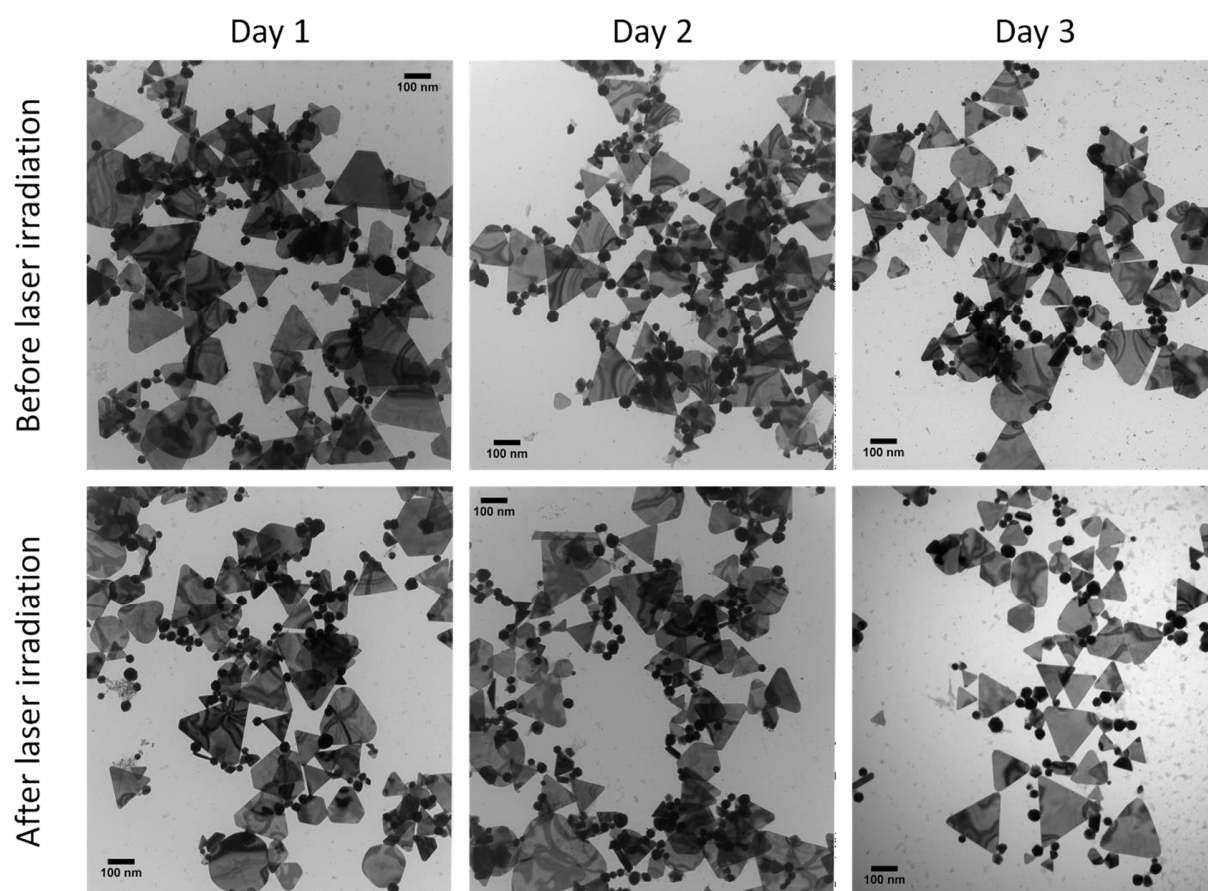

**Figure S2.** TEM images of freshly prepared AuNPL before and after laser irradiation on three consecutive days.
